# Supplementary material for: Ultrahigh Adsorption Capacity Zirconium-Magnesium Composite Oxide Nanoclusters Remove Malachite Green from Aqueous Media
Source: Hindawi journal article supplement (doi:10.1155/2022/1946955), 2022-01-01
Supplement: f1 [file 1946955.f1.docx]

**Supplementary Information for**

**Ultra High Adsorption Capacity Zirconium-Magnesium Composite Oxide Nanoclusters Remove Malachite Green from Wastewater**

Yulong Suna, Haoxin Zhengb[[1]](#footnote-1), Yanfeng Pua, Hao Yanga,*, Jianhong Wanga,*, Shuaishuai Zhoua, Qian Lia, Congzhen Qiaoa

a College of Chemistry and Chemical Engineering, Henan Province Engineering Research Center of Catalytic Reaction, Henan University, Kaifeng, China, 475004

b Shenzhen Academy of Environmental Science, Shenzhen, China, 518000


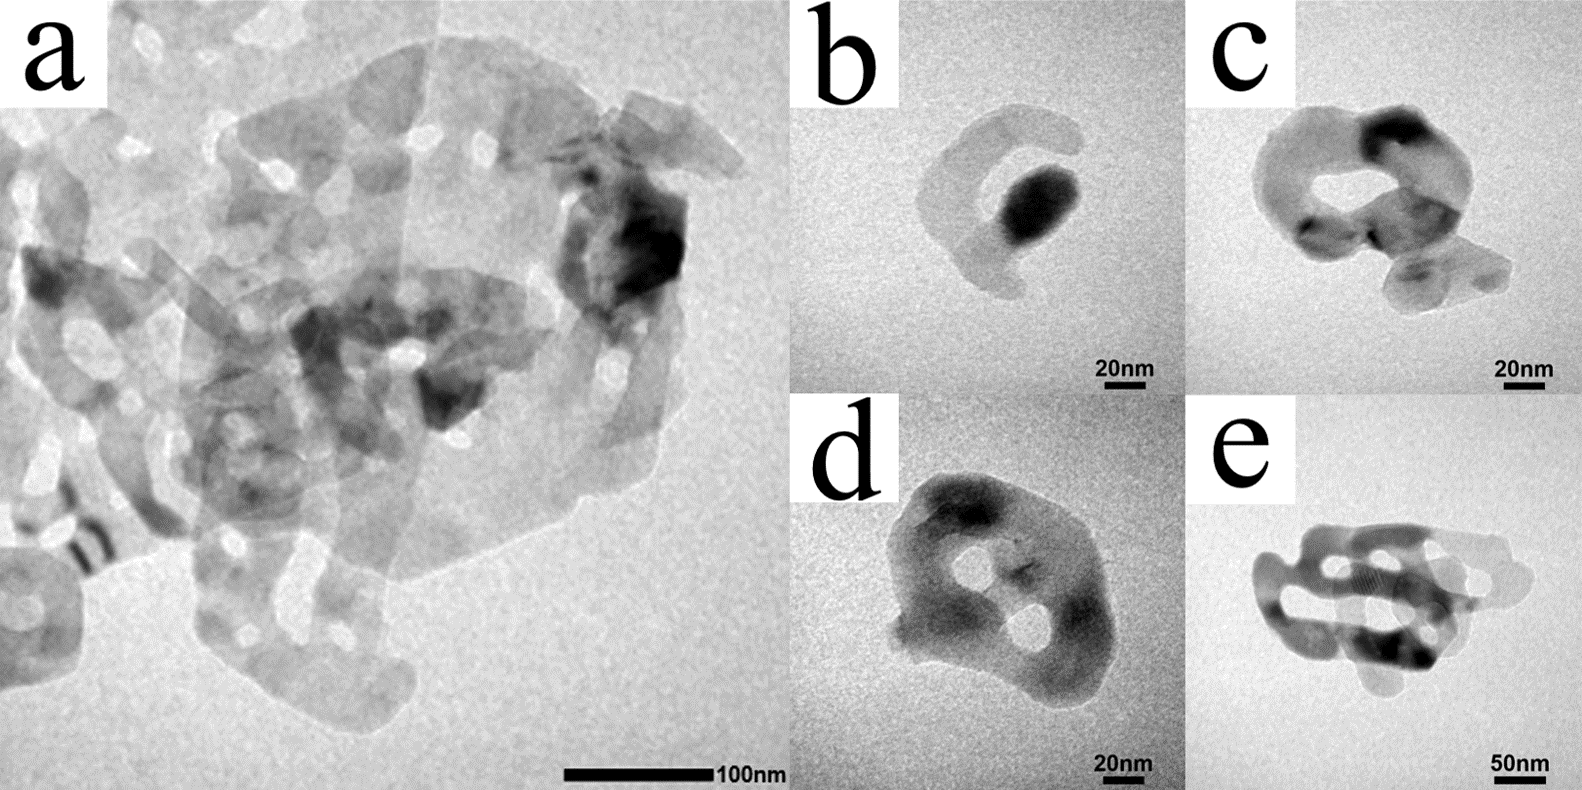


Figure S1. Figure S2. TEM images of pure MgO.


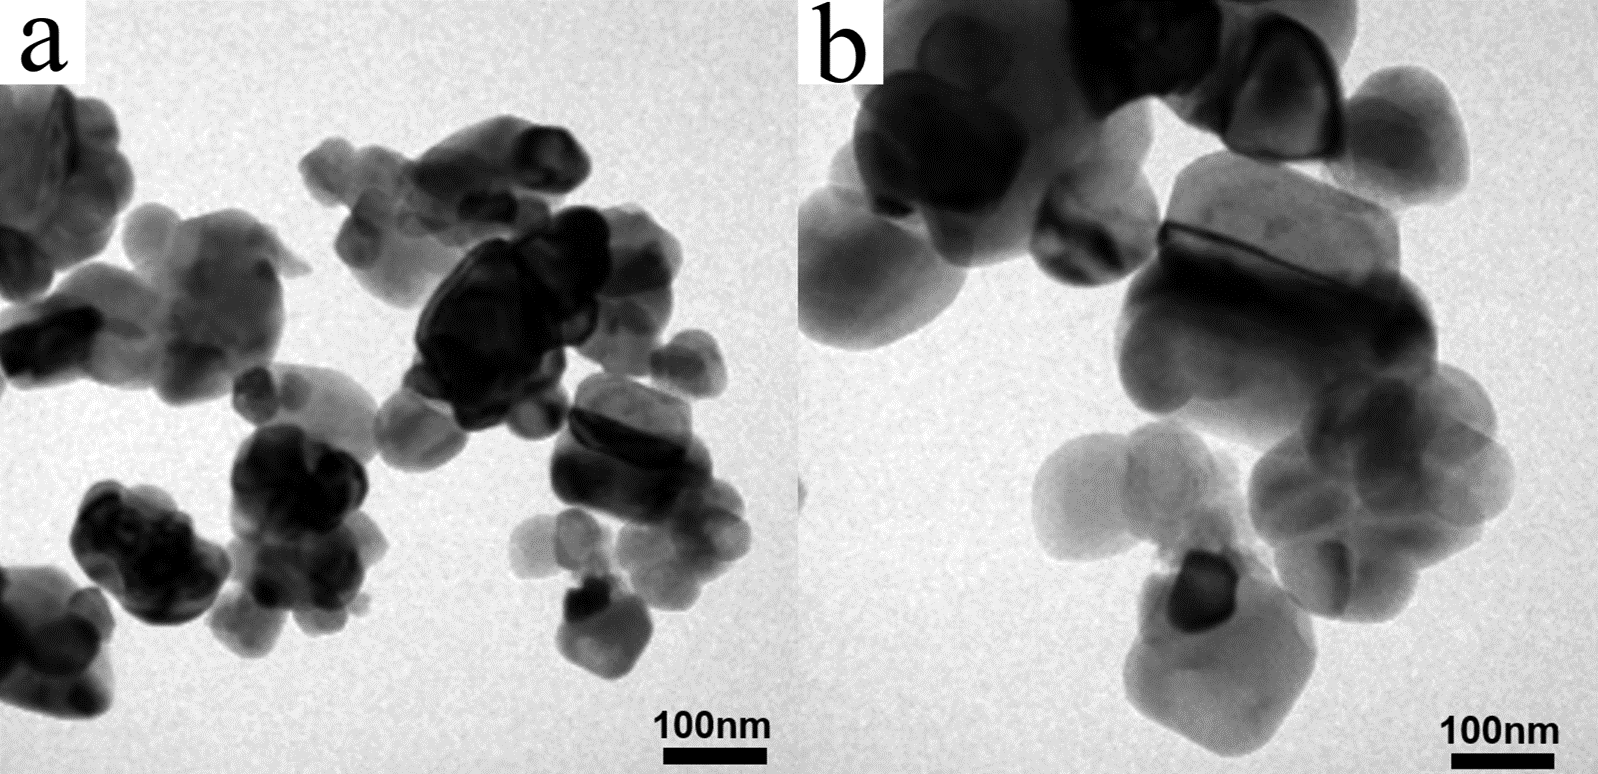


Figure S2. TEM images of pure ZrO2.

Figure S3. (a) N2 adsorption-desorption isotherms and (b) pore size distribution patterns for y-ZM samples.

Figure S4. high-resolution spectra of Zr3d on the pure ZrO2.

The binding energy of Zr 3d3/2 and Zr 3d5/2 of pure ZrO2 appears at 183.9 eV and 181.6 eV, respectively.

**Table S1.** The fitted parameters of adsorption kinetic models.

| Adsorbents | Initial conc.  (mg/L) | qe, exp. (mg/g) | Pseudo-first-order model (PFO)1 | | | Pseudo-second-order model (PSO)2 | | |
| --- | --- | --- | --- | --- | --- | --- | --- | --- |
| qe | k1 | R2 | qe | k2 | R2 |
| 2.00-ZM | 1000 | 2474.66 | 2426.63 | 0.0664 | 0.9276 | 2637.88 | 0.0000385 | 0.9507 |
| 2500 | 6307.65 | 6292.89 | 0.0359 | 0.9653 | 7160.33 | 0.0000065 | 0.9728 |

where *k1* (min-1) and *k2* (g/mg min-1) are the rate constants of pseudo-first-order, pseudo-second-order, respectively.

The fitting parameters showed that PSO was more suitable to describe the adsorption process, which indicated that the process was controlled by chemisorption as the rate step.

**Table S2.** The fitted parameters of adsorption isotherm models.

| T(K) | Parameter | 303 | 313 | 323 |
| --- | --- | --- | --- | --- |
| Langmuir model3 | qm | -7592.6 | -8037.8 | -3824.3 |
| KL | -0.4938 | -0.5186 | -0.7548 |
| R2 | 0.7720 | 0.8108 | 0.9223 |
| Freundlich model4 | KF | 7466.1 | 8923.4 | 11978.1 |
| 1/n | 2.3648 | 2.2561 | 3.3683 |
| R2 | 0.8335 | 0.8636 | 0.9693 |
| Temkin model5 | B | 22.304 | 20.697 | 25.676 |
| KT | 1.4258 | 1.5870 | 1.5765 |
| R2 | 0.9497 | 0.9628 | 0.9894 |
| Sips model6, 7 | a | 9.6603 | 9.2189 | 6.1466 |
| k | 1.0733 | 1.1701 | 1.0889 |
| qm | 13028.5 | 12909.8 | 18894.4 |
| R2 | 0.9902 | 0.9963 | 0.9874 |

where(L/mg) and (L/mg) are the constants of Langmuir, Freundlich adsorption isotherm models, respectively; *qm* (mg/g) relates to the theoretical maximum adsorption capacity; *1/n* is the adsorption intensity factor, *n* depend on the property, intensity in the adsorption process and distribution of active sites. B (kJ/mol) is the related to the heat of adsorption and KT (L/g) is the Temkin equilibrium binding constant accord with the maximum binding energy.

The fitting parameters showed that Langmuir-Freundlich model was more suitable to describe the adsorption behavior, this pointed out that single-layer adsorption and multi-layer adsorption exist simultaneously on the surface of the adsorbent.

**Reference**

1. Yao, X.; Ji, L.; Guo, J.; Ge, S.; Lu, W.; Chen, Y.; Cai, L.; Wang, Y.; Song, W., An abundant porous biochar material derived from wakame (Undaria pinnatifida) with high adsorption performance for three organic dyes. *Bioresour Technol* **2020,** *318*, 124082.

2. Dutta, S.; Srivastava, S. K.; Gupta, B.; Gupta, A. K., Hollow Polyaniline Microsphere/MnO2/Fe3O4 Nanocomposites in Adsorptive Removal of Toxic Dyes from Contaminated Water. *ACS Applied Materials & Interfaces* **2021,** *13* (45), 54324-54338.

3. Khusnun, N. F.; Hasan, N. S.; Amalina, I.; Jalil, A. A.; Firmansyah, M. L., Enhanced Recovery of Palladium from an Aqueous Solution Using an Ionic Liquid–Mesoporous Silica Composite in Batch and Fixed-Column Studies. *Industrial & Engineering Chemistry Research* **2022,** *61* (25), 8634-8644.

4. Wen, Q.; Chen, Y.; Rao, X.; Yang, R.; Zhao, Y.; Li, J.; Xu, S.; Liang, Z., Preparation of magnesium Ferrite-Doped magnetic biochar using potassium ferrate and seawater mineral at low temperature for removal of cationic pollutants. *Bioresour Technol* **2022,** *350*, 126860.

5. Pandiarajan, A.; Kamaraj, R.; Vasudevan, S.; Vasudevan, S., OPAC (orange peel activated carbon) derived from waste orange peel for the adsorption of chlorophenoxyacetic acid herbicides from water: Adsorption isotherm, kinetic modelling and thermodynamic studies. *Bioresource Technology* **2018,** *261*, 329-341.

6. Ayawei, N.; Ebelegi, A. N.; Wankasi, D., Modelling and Interpretation of Adsorption Isotherms. *Journal of Chemistry* **2017,** *2017*, 1-11.

7. Koble, R. A.; Corrigan, T. E., ADSORPTION ISOTHERMS FOR PURE HYDROCARBONS. *Industrial & Engineering Chemistry* **1952,** *44* (2), 383-387.

1. This author contributed equally to this work and can be considered as co-first author. [↑](#footnote-ref-1)
